# Supplementary material for: Mortality risk during and after opioid substitution treatment: systematic review and meta-analysis of cohort studies
Source: PubMed Central journal article supplement — BMJ. 2017 Apr 26;357:j1550. doi: 10.1136/bmj.j1550 (PMC5421454; doi:10.1136/bmj.j1550), 2017-04-26
Supplement: sorl034883.ww1.pdf [file sorl034883.ww1.pdf]

## Appendix 1: Search strings by database [posted as supplied by author]

| <b>Medline</b>                   |                                                                                                                                                                                                           |                                                                                                                                                                                                                                                                                                                                                                                                                                                  |
|----------------------------------|-----------------------------------------------------------------------------------------------------------------------------------------------------------------------------------------------------------|--------------------------------------------------------------------------------------------------------------------------------------------------------------------------------------------------------------------------------------------------------------------------------------------------------------------------------------------------------------------------------------------------------------------------------------------------|
| Group                            | Search terms                                                                                                                                                                                              |                                                                                                                                                                                                                                                                                                                                                                                                                                                  |
|                                  | <b>MeSH</b> (subterms in MeSH)                                                                                                                                                                            | <i>Non MeSH</i>                                                                                                                                                                                                                                                                                                                                                                                                                                  |
| #1 Opiate Substitution Treatment | <b>Opiate Substitution Treatment</b><br><b>Substance Abuse Treatment Centers</b><br><b>Dextropropoxyphene</b><br><b>Naltrexone</b><br><b>Buprenorphine</b><br><b>Methadone</b><br>Methadyl Acetate (LAAM) | <i>Opiate Substitution</i><br><i>Methadone</i><br><i>Methadyl Acetate (LAAM)</i><br><i>Substance Abuse Treatment</i><br><i>Dextropropoxyphene</i><br><i>Naltrexone</i><br><i>Buprenorphine</i><br><i>Opiate Treatment</i><br><i>Treatment of opioid</i><br><i>Treatment for heroin</i><br><i>Maintenance</i><br><i>Prescription opioid</i><br><i>Opioid substitution</i><br><i>Opioid replacement</i><br><i>Codeine</i><br><i>Dihydrocodeine</i> |
| #2 Mortality                     | <b>Mortality</b><br>Cause of Death<br>Fatal Outcome<br>Mortality, Premature<br>Survival Rate                                                                                                              | <i>Mortal*</i><br><i>Fatal*</i><br><i>Death*</i>                                                                                                                                                                                                                                                                                                                                                                                                 |
| #3 Cohorts Studies               | <b>Cohort Studies</b><br>Follow-Up Studies<br>Longitudinal Studies<br>National Longitudinal Study of Adolescent Health<br>Prospective Studies<br>Retrospective Studies                                    | <i>Cohort</i><br><i>Longitudinal</i><br><i>Prospective</i><br><i>Follow-up</i><br><i>Retrospective</i><br><i>Rate</i>                                                                                                                                                                                                                                                                                                                            |
| #4 Substance disorders           | <b>Substance-Related Disorders</b><br>Drug Overdose<br>Opioid-Related Disorders<br>Heroin Dependence<br>Morphine Dependence<br>Substance Abuse, Intravenous<br>Substance Withdrawal Syndrome              | <i>Drug use*</i><br><i>Drug abuse*</i><br><i>Drug misuse*</i><br><i>Drug dependence*</i><br><i>Substance abuse*</i><br><i>Substance use*</i><br><i>Substance misuse*</i><br><i>Substance dependence*</i><br><i>Addict*</i><br><i>Opioid dependence</i>                                                                                                                                                                                           |
| #1 AND #2 AND #3 AND #4:         |                                                                                                                                                                                                           | <b>1215</b>                                                                                                                                                                                                                                                                                                                                                                                                                                      |

| <b>Embase</b>                                                                  |                                                                                                                                                                                                                                                                                                                                                                 |                                                                                                                                                                                                                                                                                                                                                                                                                                                  |
|--------------------------------------------------------------------------------|-----------------------------------------------------------------------------------------------------------------------------------------------------------------------------------------------------------------------------------------------------------------------------------------------------------------------------------------------------------------|--------------------------------------------------------------------------------------------------------------------------------------------------------------------------------------------------------------------------------------------------------------------------------------------------------------------------------------------------------------------------------------------------------------------------------------------------|
| <b>Group</b>                                                                   | <b>Search terms</b>                                                                                                                                                                                                                                                                                                                                             |                                                                                                                                                                                                                                                                                                                                                                                                                                                  |
|                                                                                | <b>EMTREE</b> (subterms in EMTREE)                                                                                                                                                                                                                                                                                                                              | <i>Non EMTREE</i>                                                                                                                                                                                                                                                                                                                                                                                                                                |
| #1 Opioid Substitution Treatment                                               | <b>Drug dependence treatment</b><br>Methadone treatment<br>Nicotine replacement therapy<br>Opiate substitution treatment<br>Smoking cessation program<br><b>Drugs used in the treatment of addiction</b><br>Methadone<br>Dextropropoxyphene<br>Naltrexone<br>Buprenorphine                                                                                      | <i>Opiate Substitution</i><br><i>Methadone</i><br><i>Methadyl Acetate (LAAM)</i><br><i>Substance Abuse Treatment</i><br><i>Dextropropoxyphene</i><br><i>Naltrexone</i><br><i>Buprenorphine</i><br><i>Opiate Treatment</i><br><i>Treatment of opioid</i><br><i>Treatment for heroin</i><br><i>Maintenance</i><br><i>Prescription opioid</i><br><i>Opioid substitution</i><br><i>Opioid replacement</i><br><i>Codeine</i>                          |
| #2 Mortality                                                                   | <b>Mortality</b><br><b>Death</b><br>Accidental/cause of death                                                                                                                                                                                                                                                                                                   | <i>Mortal*</i><br><i>Fatal*</i><br><i>Death*</i>                                                                                                                                                                                                                                                                                                                                                                                                 |
| #3 Cohorts Studies                                                             | <b>Cohort analysis</b><br><b>Follow-up</b><br><b>Longitudinal studies</b><br><b>Prospective studies</b><br><b>Retrospective studies</b>                                                                                                                                                                                                                         | <i>Cohort</i><br><i>Longitudinal</i><br><i>Prospective</i><br><i>Follow-up</i><br><i>Retrospective</i><br><i>Rate</i>                                                                                                                                                                                                                                                                                                                            |
| #4 Substance disorders                                                         | <b>Drug dependence</b><br>Drug abuse pattern<br>Drug misuse<br>Drug seeking behavior<br>Multiple drug abuse<br>Narcotic dependence<br>Heroin dependence<br>Morphine addiction<br>Opiate addiction<br><b>Substance abuse</b><br><b>Drug abuse</b><br>Analgesic agent abuse<br>Drug abuse pattern<br>Drug misuse<br>Intravenous drug abuse<br>Multiple drug abuse | <i>Opiate Substitution</i><br><i>Methadone</i><br><i>Methadyl Acetate (LAAM)</i><br><i>Substance Abuse Treatment</i><br><i>Dextropropoxyphene</i><br><i>Naltrexone</i><br><i>Buprenorphine</i><br><i>Opiate Treatment</i><br><i>Treatment of opioid</i><br><i>Treatment for heroin</i><br><i>Maintenance</i><br><i>Prescription opioid</i><br><i>Opioid substitution</i><br><i>Opioid replacement</i><br><i>Codeine</i><br><i>Dihydrocodeine</i> |
| #1 AND #2 AND #3 AND #4:                                                       |                                                                                                                                                                                                                                                                                                                                                                 | 1412                                                                                                                                                                                                                                                                                                                                                                                                                                             |
| <b>Limits Activated:</b> Humans, All Adult: 19+ years, Adolescent: 13-18 years |                                                                                                                                                                                                                                                                                                                                                                 | <b>729</b>                                                                                                                                                                                                                                                                                                                                                                                                                                       |

| <b>PsycINFO</b>                  |                                                                                                                           |                                                                                                                                                                                                                                                                                                                                                                                                                            |
|----------------------------------|---------------------------------------------------------------------------------------------------------------------------|----------------------------------------------------------------------------------------------------------------------------------------------------------------------------------------------------------------------------------------------------------------------------------------------------------------------------------------------------------------------------------------------------------------------------|
| Group                            | Search terms                                                                                                              |                                                                                                                                                                                                                                                                                                                                                                                                                            |
|                                  | <b>THESAURUS</b> (subterms)                                                                                               | <i>Non THESAURUS</i>                                                                                                                                                                                                                                                                                                                                                                                                       |
| #1 Opioid Substitution Treatment | <b>Maintenance Therapy</b><br><b>Methadone</b><br><b>Methadone Maintenance</b><br><b>Naltrexone</b>                       | <i>Opiate Substitution</i><br><i>Methadone</i><br><i>Methadyl Acetate (LAAM)</i><br><i>Substance Abuse Treatment</i><br><i>Dextropropoxyphene</i><br><i>Naltrexone</i><br><i>Buprenorphine</i><br><i>Treatment of opioid</i><br><i>Treatment for heroin</i><br><i>Maintenance</i><br><i>Prescription opioid</i><br><i>Opioid substitution</i><br><i>Opioid replacement</i>                                                 |
| #2 Mortality                     | <b>Death and Dying (mortality)</b><br>Mortality Rate                                                                      | <i>Mortal*</i><br><i>Fatal*</i><br><i>Death*</i>                                                                                                                                                                                                                                                                                                                                                                           |
| #3 Cohorts Studies               | <b>Cohort analysis</b><br><b>Follow-up</b><br><b>Longitudinal studies</b><br>Prospective studies<br>Retrospective studies | <i>Cohort</i><br><i>Longitudinal</i><br><i>Prospective</i><br><i>Follow-up</i><br><i>Retrospective</i><br><i>Rate</i>                                                                                                                                                                                                                                                                                                      |
| #4 Substance disorders           | <b>Drug Abuse</b><br>Alcohol Abuse<br>Drug Dependency<br>Inhalant Abuse<br>Polydrug Abuse<br><b>Drug addiction</b>        | <i>Opiate Substitution</i><br><i>Methadone</i><br><i>Methadyl Acetate (LAAM)</i><br><i>Substance Abuse Treatment</i><br><i>Dextropropoxyphene</i><br><i>Naltrexone</i><br><i>Buprenorphine</i><br><i>Opiate Treatment</i><br><i>Treatment of opioid</i><br><i>Treatment for heroin</i><br><i>Prescription opioid</i><br><i>Opioid substitution</i><br><i>Opioid replacement</i><br><i>Codeine</i><br><i>Dihydrocodeine</i> |
| #1 AND #2 AND #3 AND #4:         |                                                                                                                           | <b>486</b>                                                                                                                                                                                                                                                                                                                                                                                                                 |

| <b>LILACS</b>                    |                                                                                                                                                |                                                                                                                                                                                 |
|----------------------------------|------------------------------------------------------------------------------------------------------------------------------------------------|---------------------------------------------------------------------------------------------------------------------------------------------------------------------------------|
| <b>Group</b>                     | <b>Search terms*</b>                                                                                                                           |                                                                                                                                                                                 |
| #1 Opioid Substitution Treatment | Opiate Substitution<br>Methadone<br>Methadyl Acetate<br>LAAM<br>Substance Abuse Treatment<br>Dextropropoxyphene<br>Naltrexone<br>Buprenorphine | Opiate Treatment<br>Treatment of opioid<br>Treatment for heroin<br>Maintenance<br>Prescription opioid<br>Opioid substitution<br>Opioid replacement<br>Codeine<br>Dihydrocodeine |
| #2 Mortality                     | Mortality                                                                                                                                      | Deaths                                                                                                                                                                          |
| #3 Cohorts Studies               | Cohort<br>Longitudinal<br>Prospective                                                                                                          | Follow-up<br>Retrospective<br>Rate                                                                                                                                              |
| #4 Substance disorders           | Drug use*<br>Drug abuse*<br>Drug misuse*<br>Drug dependence*<br>Substance abuse*<br>Substance use*                                             | Substance misuse*<br>Substance dependence*<br>Addict*<br>Addiction<br>Opioid dependence                                                                                         |
| #1 AND #2 AND #3 AND #4:         |                                                                                                                                                | <b>182</b>                                                                                                                                                                      |

\*All terms were searched in English and Spanish.
