# Supplementary material for: Mortality risk during and after opioid substitution treatment: systematic review and meta-analysis of cohort studies
Source: PubMed Central journal article supplement — BMJ. 2017 Apr 26;357:j1550. doi: 10.1136/bmj.j1550 (PMC5421454; doi:10.1136/bmj.j1550), 2017-04-26
Supplement: sorl034883.ww2.pdf [file sorl034883.ww2.pdf]

**Appendix 2:** Supplementary tables [posted as supplied by author]

**Table A** Cohort studies reporting all cause and overdose mortality rate ratios comparing first and subsequent episodes of methadone treatment\*

| First author,<br>year       | Treatment<br>episode | No of<br>person years | All cause mortality |       |                        | Overdose mortality |       |                        |
|-----------------------------|----------------------|-----------------------|---------------------|-------|------------------------|--------------------|-------|------------------------|
|                             |                      |                       | No of<br>deaths     | Rate† | Rate ratio<br>(95% CI) | No of<br>deaths    | Rate† | Rate ratio<br>(95% CI) |
| Caplehorn et al, 1994, 1996 | First                | 1200                  | 9                   | 7.5   | 3.00 (0.65 to 13.89)   | 3                  | 2.7   | 1.84 (0.19 to 17.68)   |
|                             | Subsequent           | 800                   | 2                   | 2.5   |                        | 1                  | 1.5   |                        |
| Cornish et al, 2010‡        | First                | 7926                  | 80                  | 10.1  | 1.01 (0.75 to 1.36)    |                    |       |                        |
|                             | Subsequent           | 9806                  | 98                  | 10.0  |                        |                    |       |                        |
| Nosyk et al, 2015           | First                | 1892                  | 81                  | 42.8  | 0.76 (0.58 to 0.98)    |                    |       |                        |
|                             | Subsequent           | 3418                  | 193                 | 56.5  |                        |                    |       |                        |
| Cousins et al, 2016         | First                | 6313                  | 37                  | 5.9   | 0.75 (0.53 to 1.07)    | 17                 | 2.7   | 1.00 (0.58 to 1.71)    |
|                             | Subsequent           | 22583                 | 176                 | 7.8   |                        | 61                 | 2.7   |                        |

\*Episodes included periods in and out of treatment, except for Caplehorn et al in which only periods in treatment were considered.

†Rates per 1000 person years.

‡Mortality during first and subsequent treatment episodes was reported combining methadone with buprenorphine (13.7% of person years).

**Table B** Cohort studies comparing all cause and overdose mortality rates after incomplete and complete methadone treatment\*

| First author,<br>year | Treatment<br>completeness | No of<br>person years | All cause mortality |                   |                        | Overdose mortality |                   |                        |
|-----------------------|---------------------------|-----------------------|---------------------|-------------------|------------------------|--------------------|-------------------|------------------------|
|                       |                           |                       | No of<br>deaths     | Rate <sup>†</sup> | Rate ratio<br>(95% CI) | No of<br>deaths    | Rate <sup>†</sup> | Rate ratio<br>(95% CI) |
| Grönbladh et al, 1990 | Incomplete                | 376                   | 26                  | 69.1              | 4.19 (1.72 to 10.18)   | 22                 | 58.5              | 4.25 (1.61 to 11.23)   |
|                       | Complete                  | 364                   | 6                   | 16.5              |                        | 5                  | 13.7              |                        |
| Cornish et al, 2010‡  | Incomplete                |                       |                     |                   | 0.95 (0.24 to 3.73)    |                    |                   |                        |
|                       | Complete                  |                       |                     |                   |                        |                    |                   |                        |
| Peles et al, 2010     | Incomplete                | 563                   | 47                  | 83.5              | 3.26 (1.30 to 8.21)    |                    |                   |                        |
|                       | Complete                  | 196                   | 5                   | 25.6              |                        |                    |                   |                        |

\*Entire periods out of treatment were included in all cohort studies except Cornish et al, which only considered the first four weeks after leaving treatment.

<sup>†</sup>Rates per 1000 person years.

<sup>‡</sup>Mortality after incomplete and complete treatment was reported combining methadone with buprenorphine (14.9% of person years out of treatment).
